# Supplementary material for: Prevalence and complications of diabetes mellitus In India - A systematic review
Source: Research Square preprint supplement (doi:10.21203/rs.3.rs-1292516/v1), 2022-02-03
Supplement: Supplementary file 1 [file 71d07e02633e3ab8f4b851f9.docx]

**Supplementary File 1**

Flow diagram for the selection of studies for prevalence of type 2 Diabetes

**Identification**

.

**Records excluded (n = 1723), with reasons**

-Abstract (n=55)

-Inappropriate Comparison Group (n=140)

-Inappropriate Intervention (n=1006)

-Inappropriate Outcomes (n=105)

-Inappropriate Population (n=204)

-Not a type 2 diabetes study (n=43)

-Review article (n=149)

-Survey or questionnaire (n=21)

Initial records identified

PubMed (n= 2305)

**Screening**

Initial records screened based on title and abstract

(n = 2305)

**Records excluded (n = 540), with reasons**

-Inappropriate Intervention (n=125)

-Inappropriate Population (n=255)

-Only self-reported diabetes (n=19)

-Specific community/ age/ patient/ ethnic group (n=151)

**Eligibility**

Full-text articles assessed for eligibility (n = 582)

**Included**

Articles included in systematic review (n = 42)

**Supplementary File 2**

Flow diagram for the selection of studies for macrovascular complication of Type 2 Diabetes

**Identification**

.

Records excluded (n = 1169), with reasons

-Abstract (n=75)

-Inappropriate Comparison Group (n=123)

-Inappropriate Intervention (n=579)

-Inappropriate Outcomes (n=79)

-Inappropriate Population (n=187)

-Not a type 2 diabetes study (n=37)

-Review article (n=89)

Initial records identified

PubMed (n= 1213)

**Screening**

Initial records screened based on title and abstract

(n = 1213)

Records excluded (n = 30), with reasons

-Inappropriate Intervention (n=4)

-Inappropriate Population (n=19)

-Specific community/ age/ patient/ ethnic group (n =7)

**Eligibility**

Full-text articles assessed for eligibility (n = 44)

**Included**

Articles included in systematic review (n = 14)

**Supplementary File 3**

For the prevalence of type 2 Diabetes

**Database: PubMed**

**Search String used:** Prevalence of diabetes mellitus in India [ADD with AND]

**Filters applied**: English, Adults, from 2000/1/1 – 2021/9/30.

For macrovascular complication of Type 2 Diabetes

**Database: PubMed**

**Search String used:** Prevalence of diabetes complication in India [ADD with AND]

**Filters applied**: English, Adults, from 2000/1/1 – 2021/9/30.
